# Supplementary material for: Divergent acute versus prolonged pharmacological GLP-1R responses in adult beta cell-selective β-arrestin 2 knockout mice
Source: bioRxiv or medRxiv preprint supplement (doi:10.1101/2022.04.21.489075), 2022-06-28

# Extended Data Figure 3

**a**

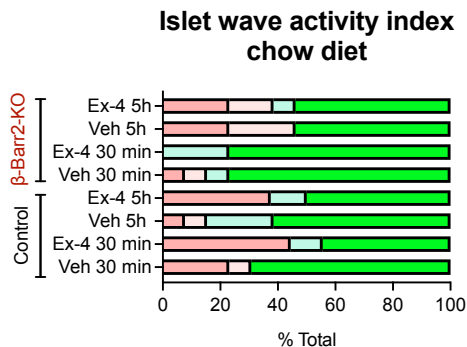

**b**

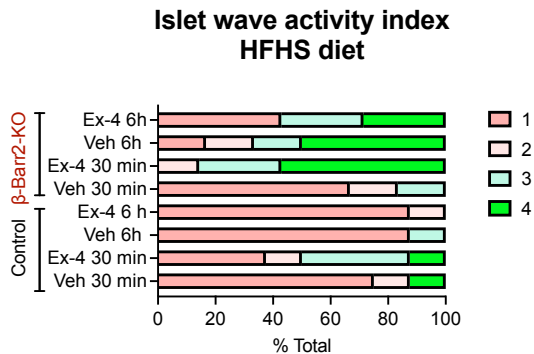

**c**

**Amplitude chow diet**

- GCaMP6f Control
- GCaMP6f β-Barr2-KO

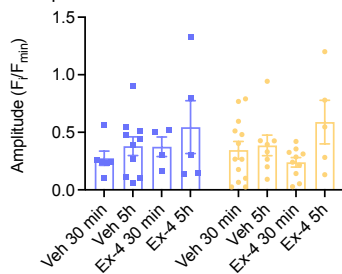

**Wavelength chow diet**

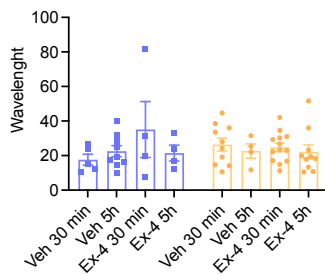

**FWHM chow diet**

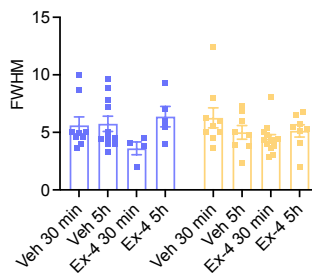

**e**

**% Connectivity  
chow diet**

- GCaMP6f Control
- GCaMP6f β-Barr2-KO

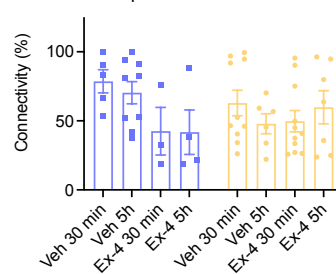

**d**

**Amplitude HFSD**

- GCaMP6f Control
- GCaMP6f β-Barr2-KO

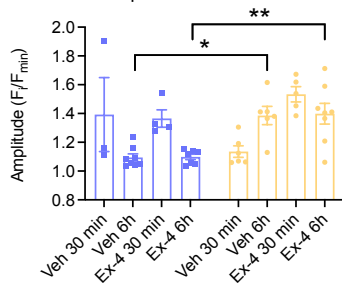

**Wavelength HFSD**

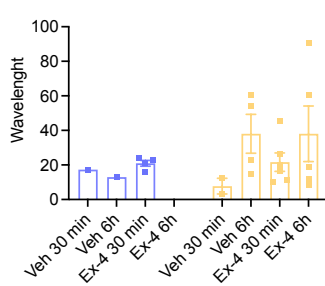

**FWHM HFSD**

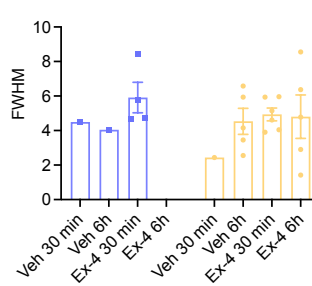

Supplement: Supplementary file [file media-3.pdf]
