# Supplementary material for: Divergent acute versus prolonged pharmacological GLP-1R responses in adult beta cell-selective β-arrestin 2 knockout mice
Source: bioRxiv or medRxiv preprint supplement (doi:10.1101/2022.04.21.489075), 2022-06-28

# Extended Data Figure 5

**a**

SNAP-GLP-1R  $\beta$ -arrestin 2

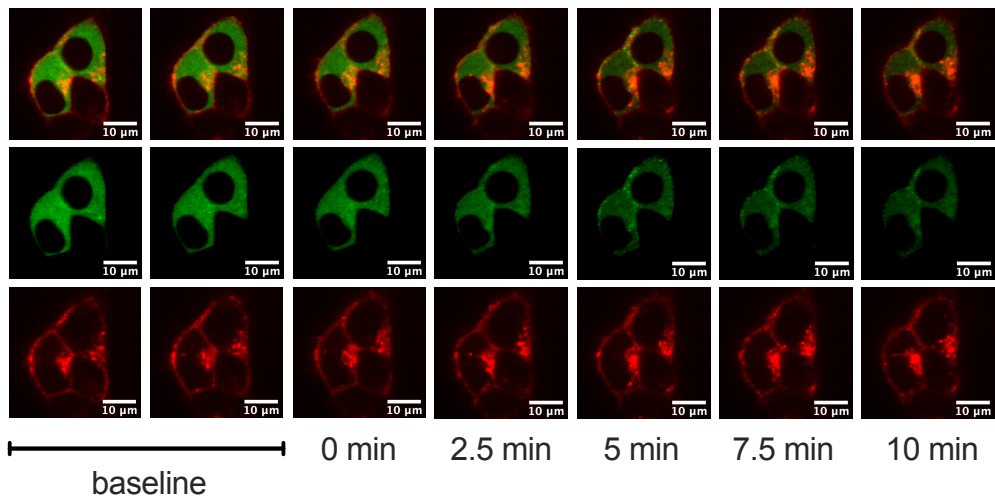

**b**

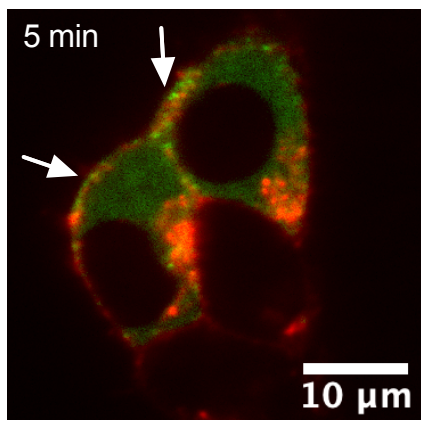

Supplement: Supplementary file [file media-5.pdf]
