# Supplementary material for: Divergent acute versus prolonged pharmacological GLP-1R responses in adult beta cell-selective β-arrestin 2 knockout mice
Source: bioRxiv or medRxiv preprint supplement (doi:10.1101/2022.04.21.489075), 2022-06-28

# Extended Data Figure 6

**a** Plasma membrane GIPR signal

◆ INS-1 832/3 Control  
◆ INS-1 832/3 Barr2-KD

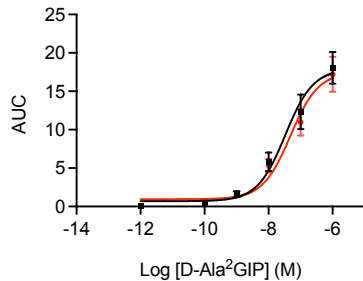

Endosomal GIPR signal

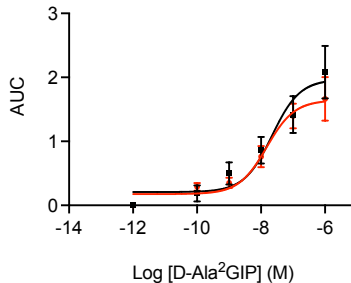

**b**

logEC<sub>50</sub> GIPR

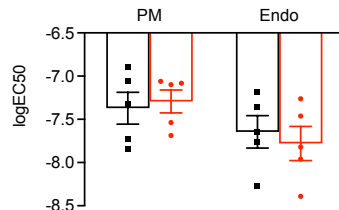

E<sub>max</sub> GIPR

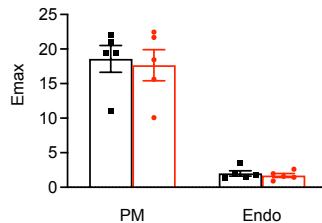

Supplement: Supplementary file [file media-6.pdf]
