# Supplementary material for: Divergent acute versus prolonged pharmacological GLP-1R responses in adult beta cell-selective β-arrestin 2 knockout mice
Source: bioRxiv or medRxiv preprint supplement (doi:10.1101/2022.04.21.489075), 2022-06-28

### Barr2 downregulation

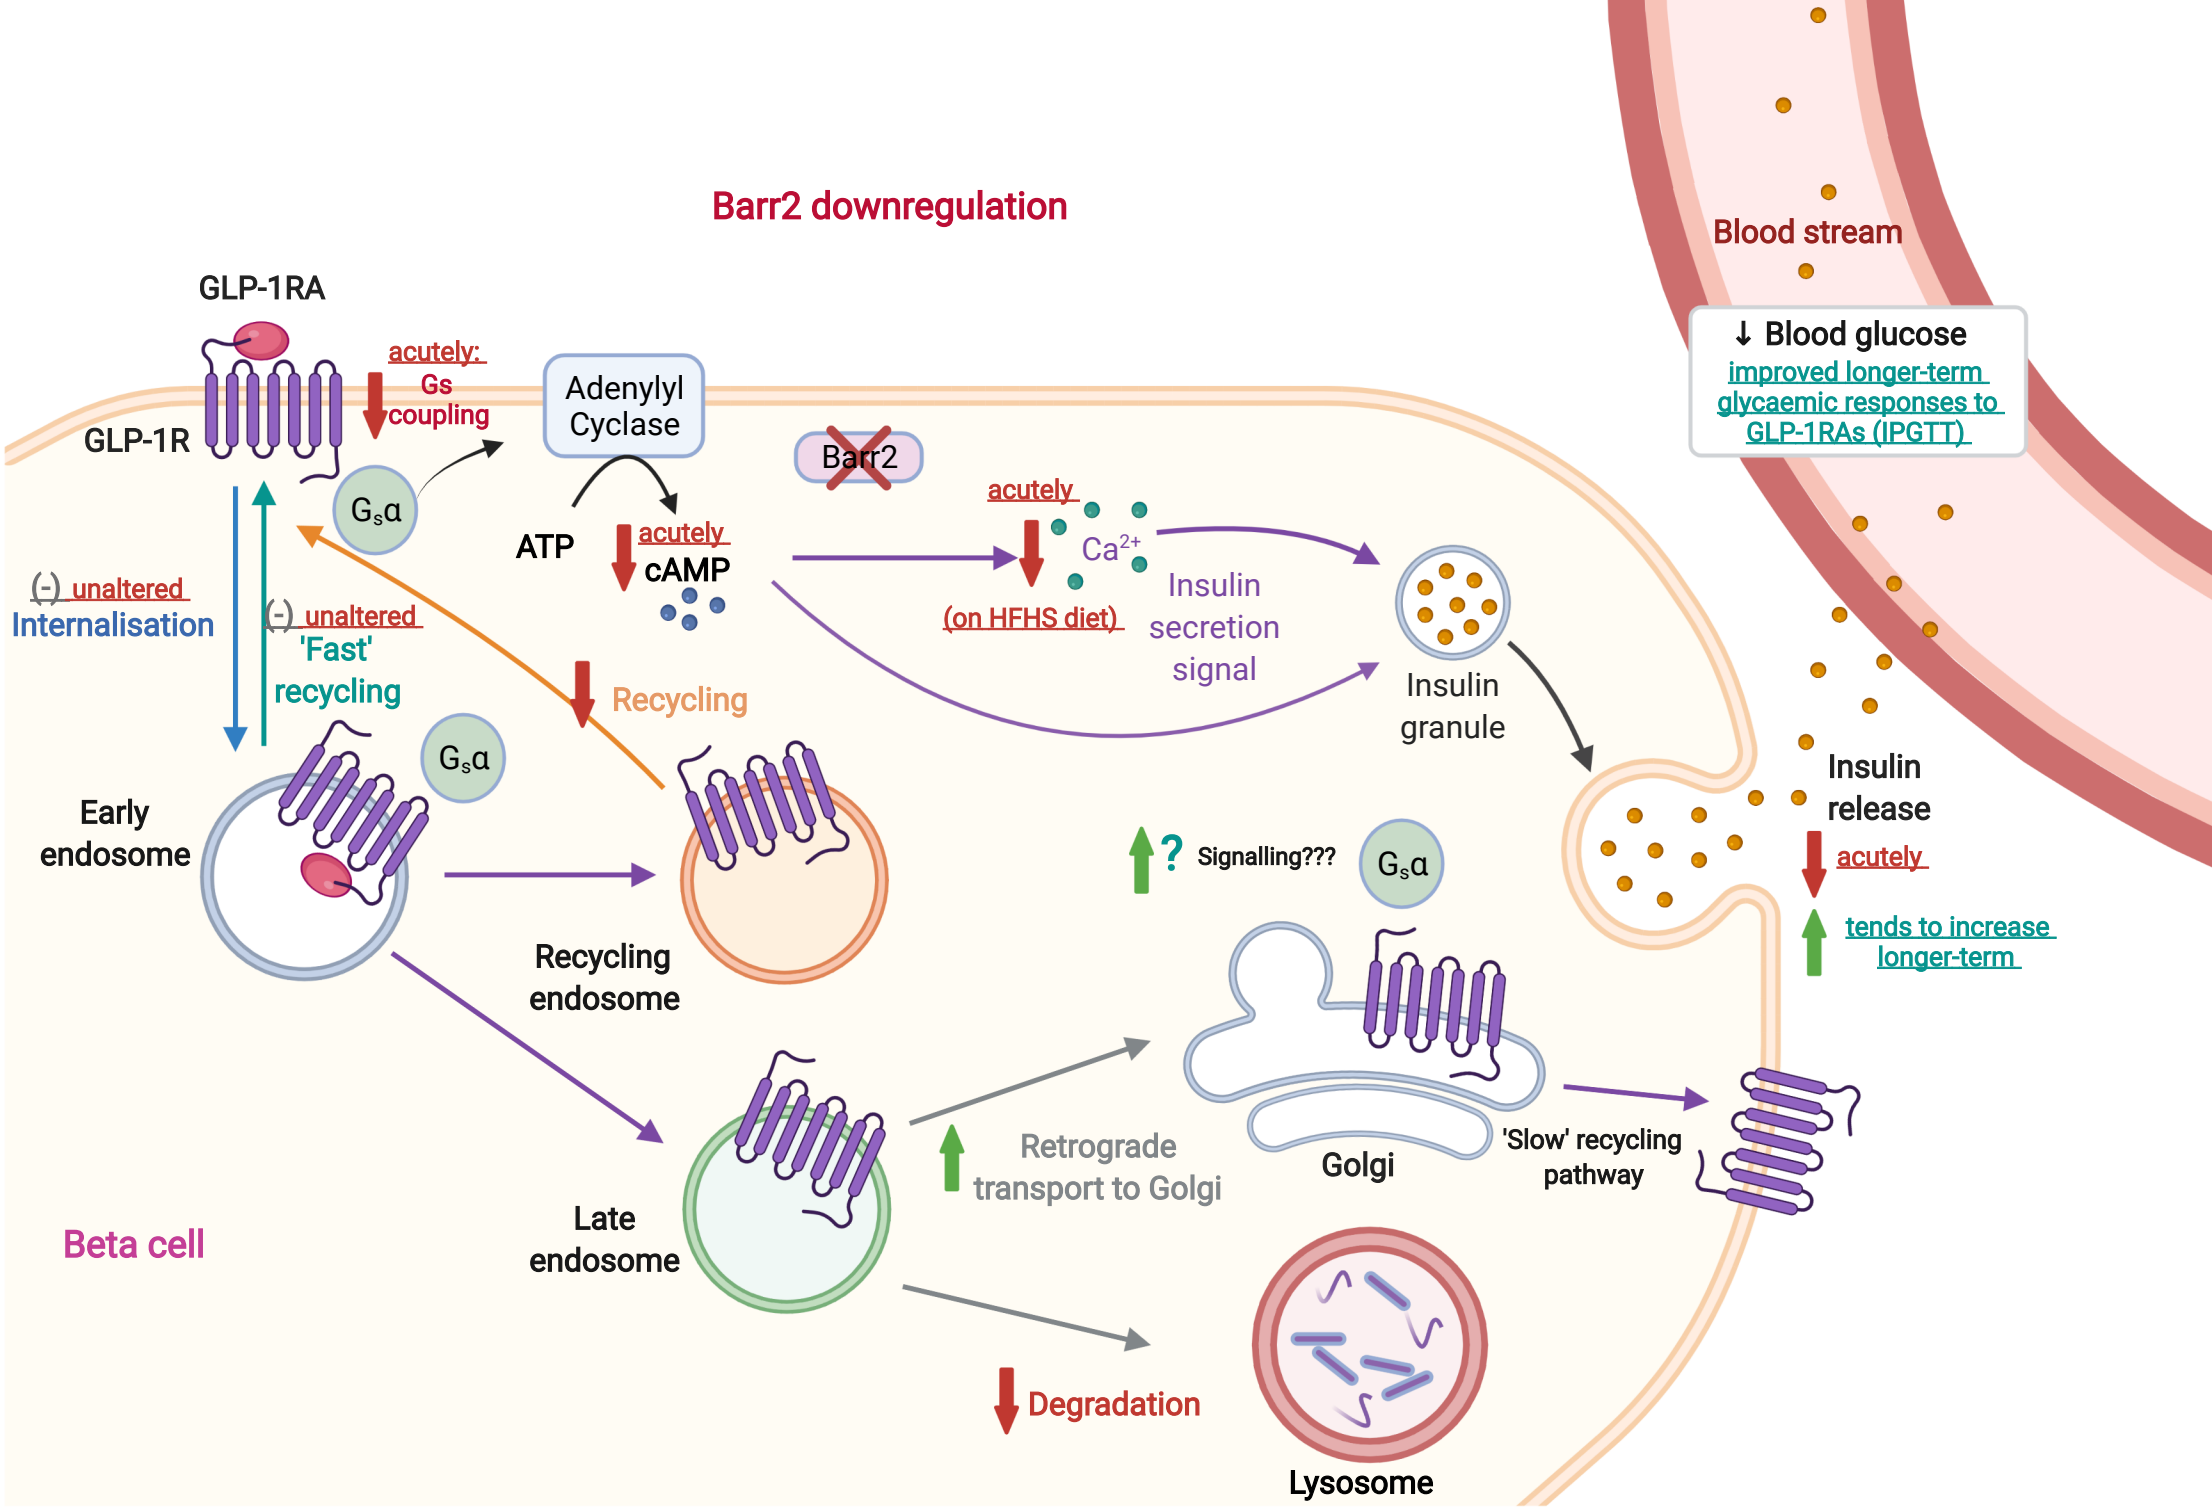

Supplement: Supplementary file [file media-8.pdf]
